# Supplementary material for: Huangqi-Danshen Decoction Ameliorates Adenine-Induced Chronic Kidney Disease by Modulating Mitochondrial Dynamics
Source: Evid Based Complement Alternat Med. 2019 Jan 1;2019:9574045. doi: 10.1155/2019/9574045 (PMC6332985; doi:10.1155/2019/9574045)
Supplement: Supplementary Materials — Supplementary Figure 1. Typical LC-MS chromatogram of HDD. (a) Structures of chemical markers analyzed in HDD extract, including calycosin 7-O-β-glucoside (1), salvianolic acid B (2), astragaloside IV (3), protocatechualdehyde (4), caffeic acid (5), rosmarinic acid (6), and lithospermic acid (7). (b) The representative LC-MS chromatograms of mixed standards and HDD extract. Supplementary Table1. The levels of aspartate transaminase (AST) and alanine transaminase (ALT) in different groups. [file 9574045.f1.pdf]

**Supplementary Figure 1. The HPLC profile of HDD extract**

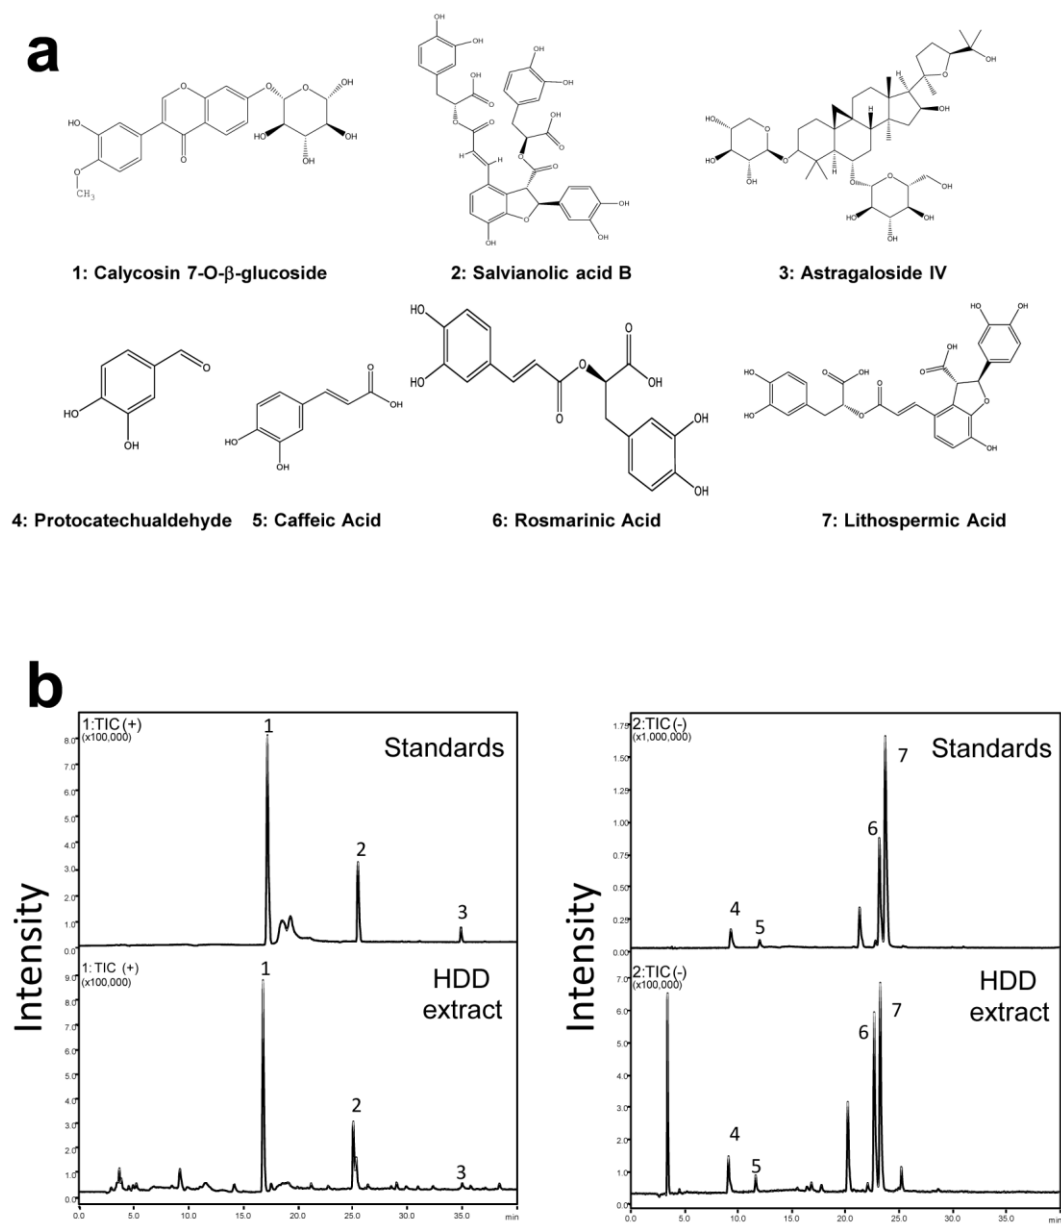

**Supplementary Table 1.** Liver function data

| Group   | AST (U/L) | ALT (U/L) |
|---------|-----------|-----------|
| Control | 91.3±6.7  | 28.6±1.0  |
| CKD     | 90.8±3.3  | 28.1±1.6  |
| CKD+HDD | 91.6±4.6  | 27.4±0.6  |

Data are presented as the means ± SEM, n=6 rats per group.
